# Supplementary material
Source: publisher site journal article supplement (https://www.dovepress.com/article/316135)
Supplement: Supplementary file 1 [file get_supplementary_file.php]

## Questionnaire for assessment of image quality

Sample number________

What type of acquisition do you think this is? (please tick one)

*Fluorosave* Cine DSA

|  | noise | Image contrast | Image sharpness | Fit for purpose  ***Please choose one** |
| --- | --- | --- | --- | --- |
| non-diagnostic |  |  |  | **Yes No** |
| acceptable |  |  |  |
| ideal |  |  |  |

Comments/explanation _____________________________________________________________________________________________________________________________________________________________________________________________________________________________________________________

Was there vascular pathology present on the image? Yes No

If yes, please state diagnosis

____________________________________________________________________________________________________________________________________________________________________

If you determined that this acquisition type was cine or DSA, in your opinion, would the pathology still be able to be identified on images of lessor quality (i.e. *fluorosave*)?

Yes No
